# Supplementary material
Source: bioRxiv or medRxiv preprint supplement (https://www.biorxiv.org/highwire/filestream/52843/field_highwire_adjunct_files/9/175505-8.pdf)

## Supplementary Figure 2

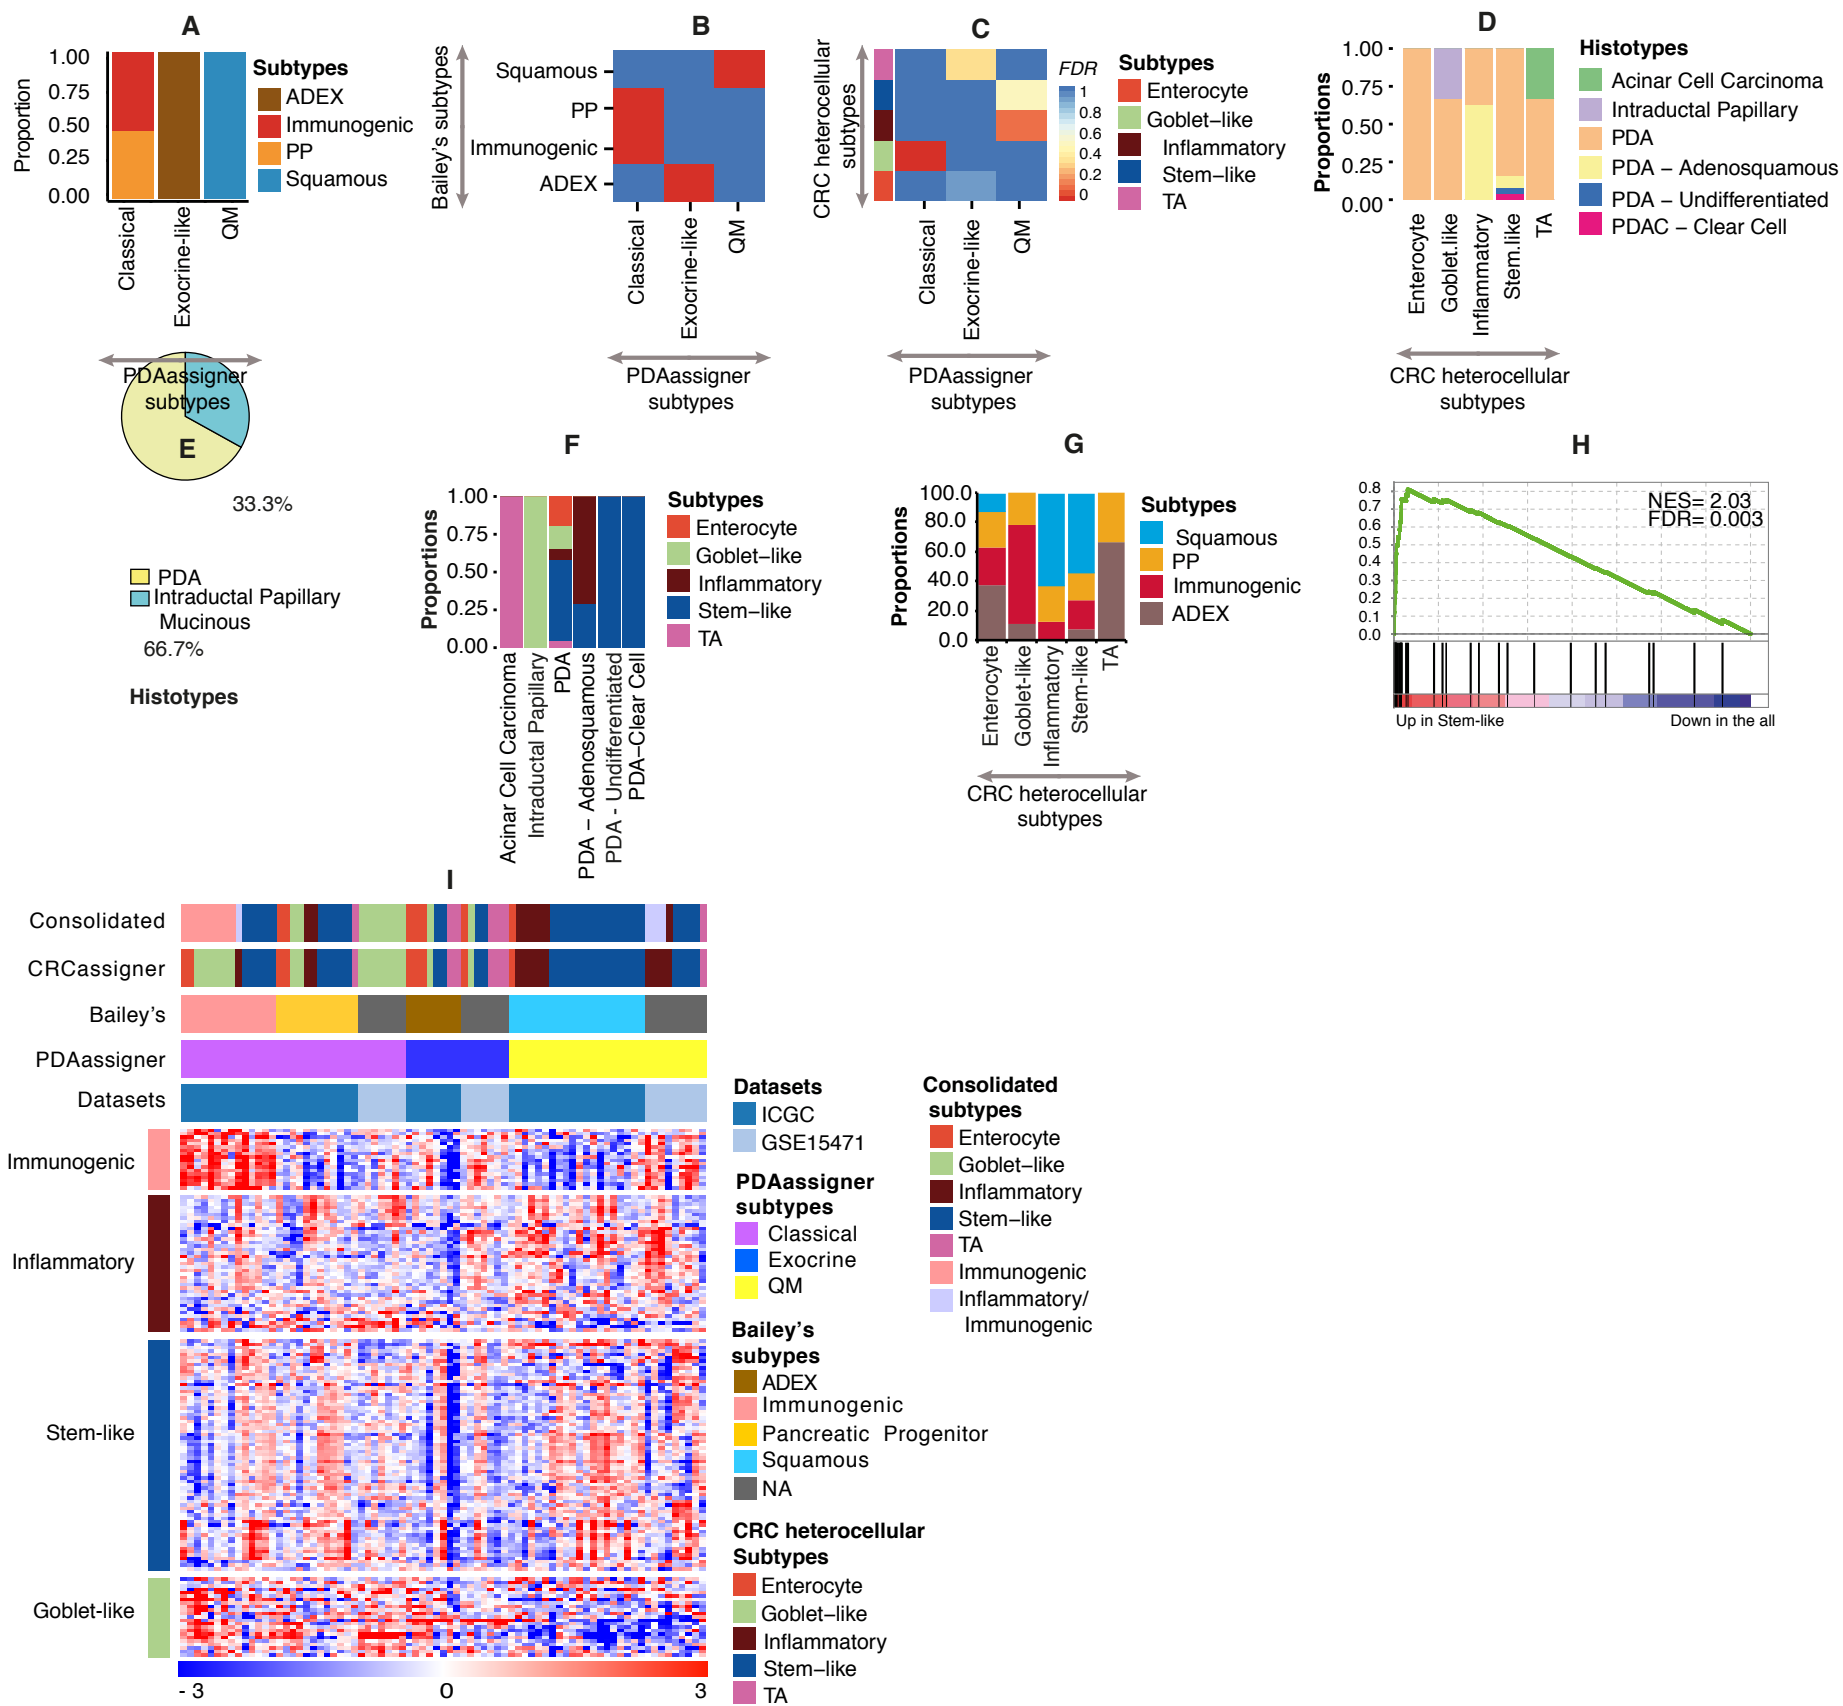

Supplement: Supplementary file [file 175505-8.pdf]
